# Supplementary material for: Mechanism Study of Thermally Induced Anti-Tumor Drug Loading to Engineered Human Heavy-Chain Ferritin Nanocages Aided by Computational Analysis
Source: MDPI journal article supplement (doi:10.3390/bios11110444), 2021-11-11
Supplement: s1 [file s1]

Supplementary

# Mechanism study of thermally induced anti-tumor drug loading to engineered human heavy-chain ferritin nanocages aided by computational analysis

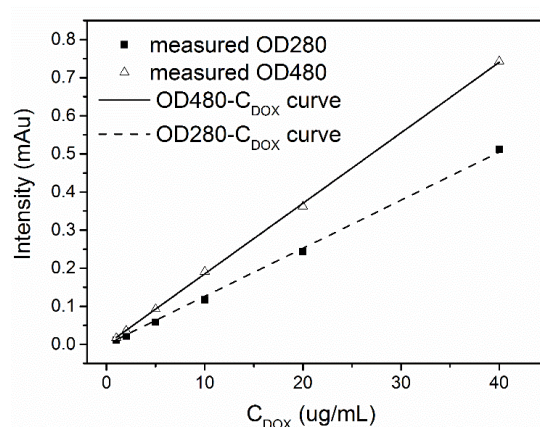

(A)

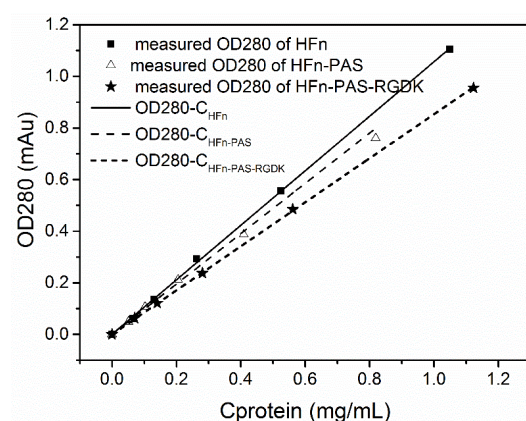

(B)

**Figure S1.** Standard linear curves of correlations between drug or HFn-based protein nanocages concentrations and optical densities. (A) OD480-CDOX and OD280-CDOX correlation curves. OD280=0.0126 CDOX, R2 = 0.999, OD480 = 0.0185 CDOX, R2 = 0.999 (B) OD280-Cnanocage correlation curves; HFn, OD280= 1.0561 C, R2 = 0.999; HFn-PAS, OD280= 0.9258 C, R2 = 0.998; HFn-PAS-RGDK, OD280= 0.8529 C, R2 = 0.999

**Table S1.** Loading ratios (Ns), proportions of DOX loaded in nanocage and protein recovery percentages in HFn thermally induced drug loading optimization.

| Temperature | Thermal induction duration | Buffer pH | N     | Proportion of DOX loaded in nanocage (%) | Protein recovery (%) |
|-------------|----------------------------|-----------|-------|------------------------------------------|----------------------|
| 45 °C       | 2 h                        | 7.0       | 19.06 | 95.2                                     | 99.5                 |
|             |                            | 7.5       | 26.30 | 95.6                                     | 99.3                 |
|             | 4 h                        | 7.0       | 23.88 | 94.1                                     | 96.3                 |
|             |                            | 7.5       | 28.51 | 93.7                                     | 98.7                 |

|    |       |     |     |       |      |      |
|----|-------|-----|-----|-------|------|------|
| °C | 50    | 6 h | 7.0 | 28.62 | 92.0 | 95.1 |
|    |       |     | 7.5 | 30.26 | 88.5 | 98.2 |
|    |       | 2 h | 7.0 | 27.04 | 95.6 | 99.2 |
|    |       |     | 7.5 | 28.28 | 94.5 | 98.9 |
|    |       | 4 h | 7.0 | 38.69 | 91.6 | 98.7 |
|    |       |     | 7.5 | 40.80 | 90.7 | 97.5 |
|    | 60 °C | 6 h | 7.0 | 41.24 | 89.8 | 98.1 |
|    |       |     | 7.5 | 41.64 | 87.2 | 97.2 |
|    |       | 2 h | 7.0 | 34.60 | 81.7 | 82.1 |
|    |       |     | 7.5 | 37.53 | 69.5 | 81.5 |
|    |       | 4 h | 7.0 | 49.25 | 70.1 | 79.8 |
|    |       |     | 7.5 | 55.69 | 56.1 | 73.3 |
|    |       | 6 h | 7.0 | 56.67 | 58.9 | 74.2 |
|    |       |     | 7.5 | 54.56 | 43.4 | 71.2 |

**Table S2.** Loading ratios (Ns), proportions of DOX loaded in nanocage and protein recovery percentages in HFn-PAS-RGDK thermally induced drug loading optimization.

| Temperature | Thermal induction duration | Buffer pH | N     | Proportion of DOX loaded in nanocage (%) | Protein recovery (%) |
|-------------|----------------------------|-----------|-------|------------------------------------------|----------------------|
| 45 °C       | 2 h                        | 7.0       | 18.10 | 96.7                                     | 85.5                 |
|             |                            | 7.5       | 23.20 | 96.5                                     | 83.7                 |
|             | 4 h                        | 7.0       | 20.92 | 94.3                                     | 83.3                 |
|             |                            | 7.5       | 29.43 | 93.3                                     | 81.3                 |
|             | 6 h                        | 7.0       | 31.13 | 81.3                                     | 80.7                 |
|             |                            | 7.5       | 30.84 | 85.8                                     | 79.5                 |
| 50 °C       | 2 h                        | 7.0       | 25.35 | 95.3                                     | 83.7                 |
|             |                            | 7.5       | 30.44 | 88.4                                     | 80.0                 |
|             | 4 h                        | 7.0       | 35.29 | 90.2                                     | 80.23                |
|             |                            | 7.5       | 36.54 | 87.1                                     | 79.3                 |
|             | 6 h                        | 7.0       | 43.60 | 80.2                                     | 77.4                 |
|             |                            | 7.5       | 45.16 | 78.5                                     | 76.0                 |
| 60 °C       | 2 h                        | 7.0       | 33.37 | 68.5                                     | 78.5                 |
|             |                            | 7.5       | 37.41 | 43.7                                     | 78.9                 |
|             | 4 h                        | 7.0       | 42.73 | 40.5                                     | 73.4                 |
|             |                            | 7.5       | 49.28 | 20.6                                     | 72.5                 |
|             | 6 h                        | 7.0       | 56.03 | 5.1                                      | 70.4                 |
|             |                            | 7.5       | 59.68 | 5.0                                      | 69.9                 |

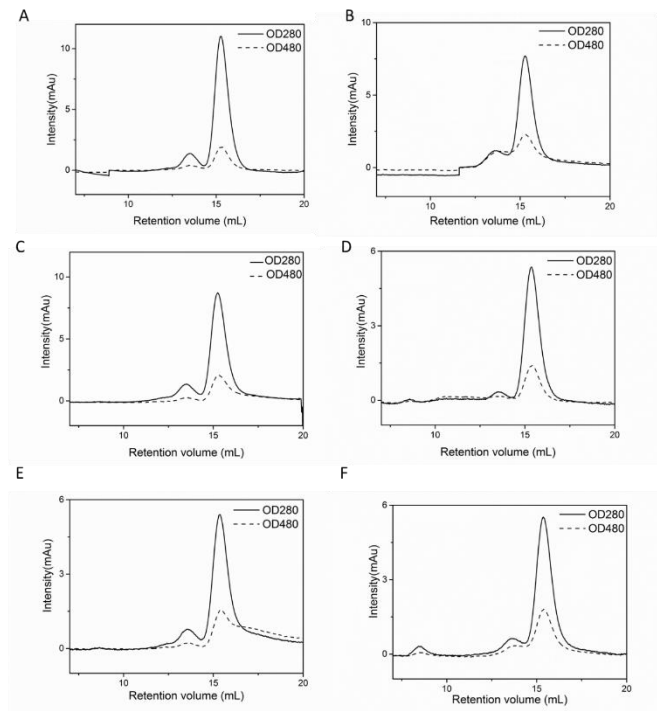

(1) Chromatograms of 45 °C HFn/DOX samples. pH 7.0, 2 h (A), pH 7.5 2 h (B), pH 7.0, 4 h (C), pH 7.5 4 h (D), pH 7.0 6 h (E), pH 7.5 6 h (F).

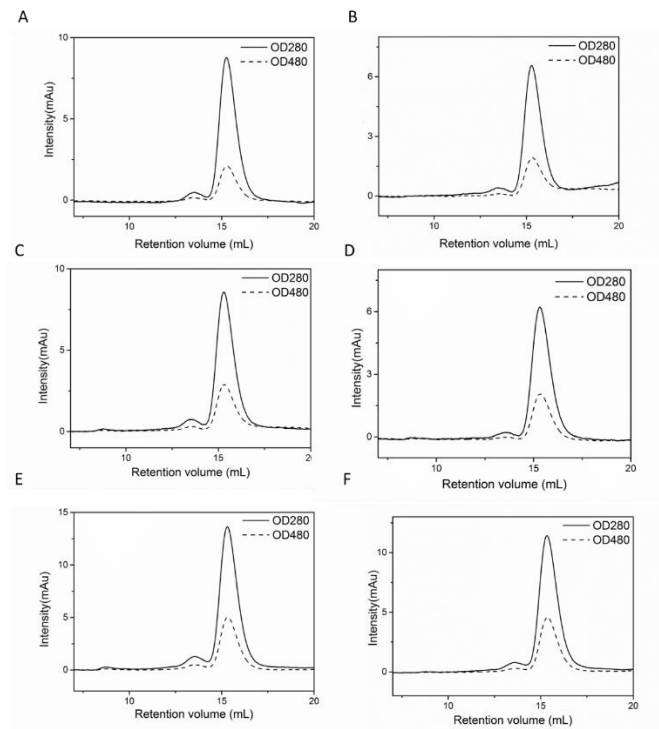

(2) Chromatograms of 50 °C HFn/DOX samples. pH 7.0, 2 h (A), pH 7.5 2 h (B), pH 7.0, 4 h (C), pH 7.5 4 h (D), pH 7.0 6 h (E), pH 7.5 6 h (F).

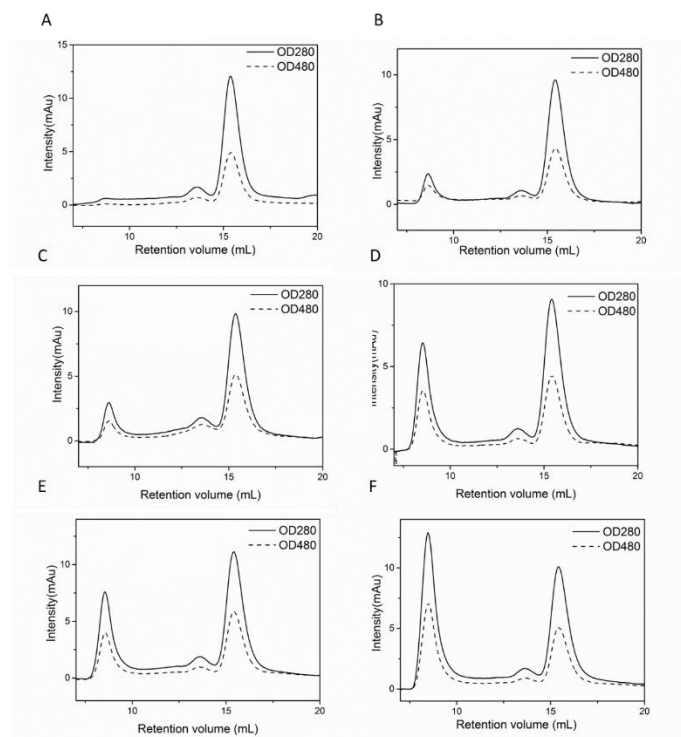

(3) Chromatograms of 60 °C HFn/DOX samples. pH 7.0, 2 h (A), pH 7.5 2 h (B), pH 7.0, 4 h (C), pH 7.5 4 h (D), pH 7.0 6 h (E), pH 7.5 6 h (F).

**Figure S2.** Size exclusion chromatograms of all HFn/DOX samples under 18 conditions in thermally induced drug loading optimization.

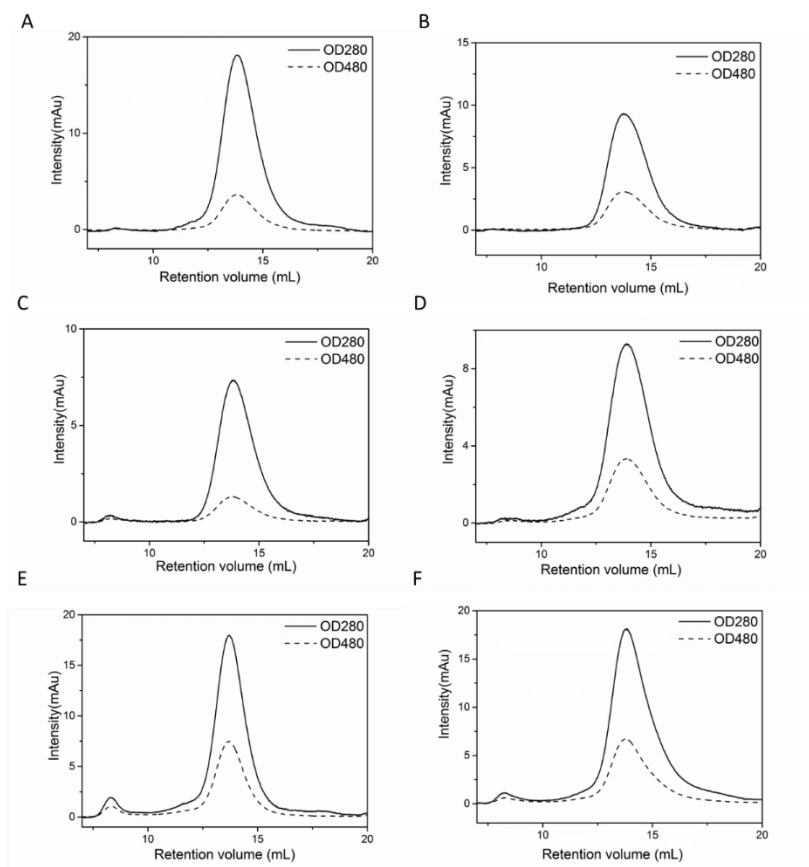

(1) Chromatograms of 45 °C HFn-GFLG-PAS-RGDK/DOX samples. pH 7.0, 2 h (A), pH 7.5 2 h (B), pH 7.0, 4 h (C), pH 7.5 4 h (D), pH 7.0 6 h (E), pH 7.5 6 h (F).

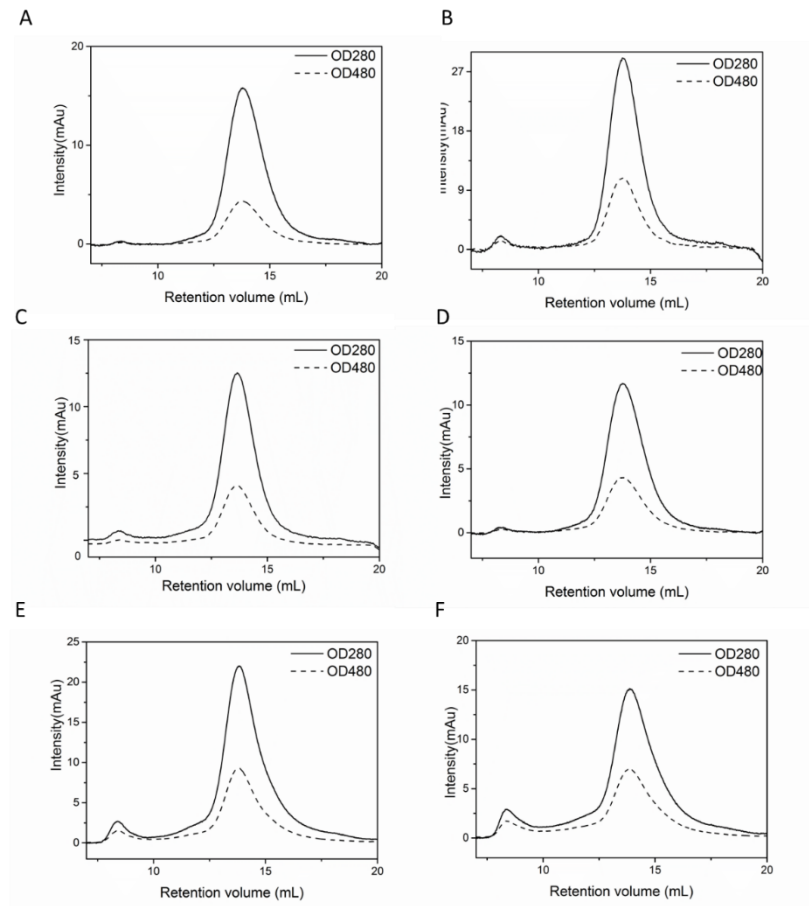

(2) Chromatograms of 50 °C HFn-GFLG-PAS-RGDK/DOX samples. pH 7.0, 2 h (A), pH 7.5 2 h (B), pH 7.0, 4 h (C), pH 7.5 4 h (D), pH 7.0 6 h (E), pH 7.5 6 h (F).

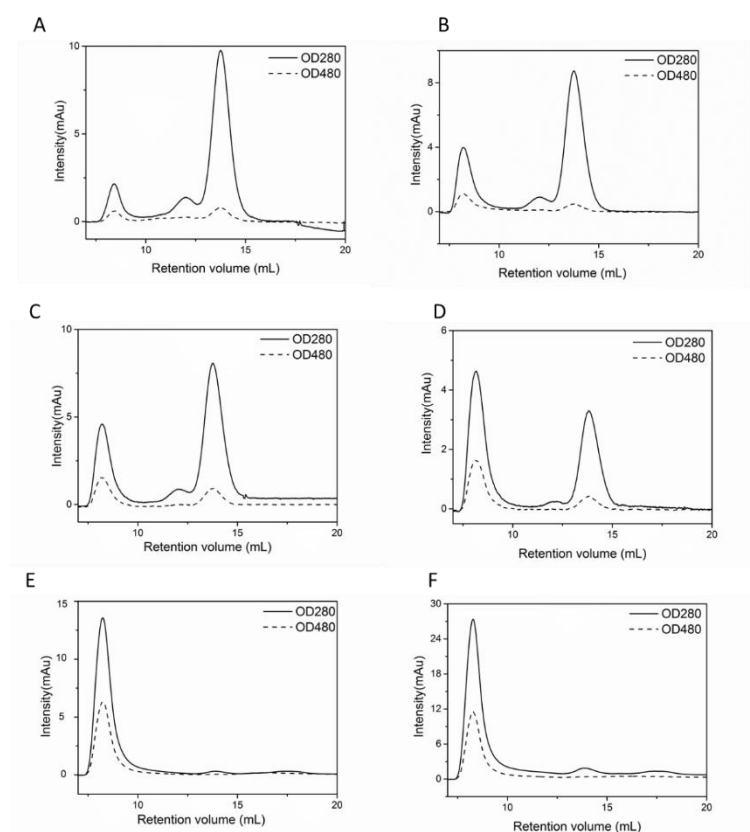

(3) Chromatograms of 60 °C HF<sub>n</sub>-GFLG-PAS-RGDK/DOX samples. pH 7.0, 2 h (A), pH 7.5 2 h (B), pH 7.0, 4 h (C), pH 7.5 4 h (D), pH 7.0 6 h (E), pH 7.5 6 h (F).

**Figure S3.** Size exclusion chromatograms of all HF<sub>n</sub>-GFLG-PAS-RGDK/DOX samples under 18 conditions in thermally induced drug loading optimization.

(1) Complex 1

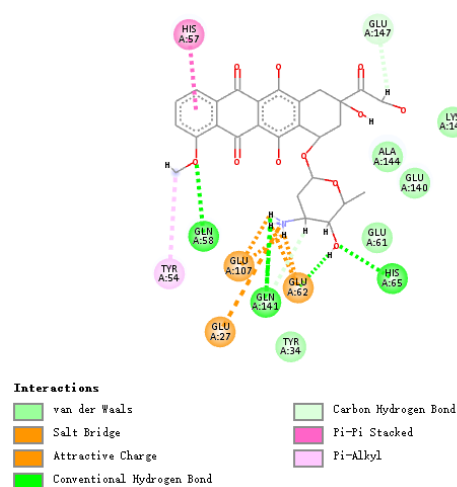

(2) Complex 4

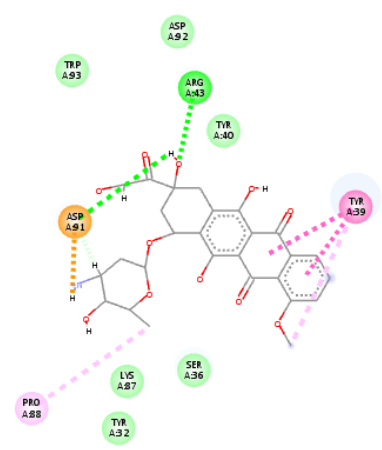

**Interactions**

|                            |               |
|----------------------------|---------------|
| van der Waals              | Pi-Pi Stacked |
| Salt Bridge                | Alkyl         |
| Conventional Hydrogen Bond | Pi-Alkyl      |
| Carbon Hydrogen Bond       |               |

(3) Complex 5

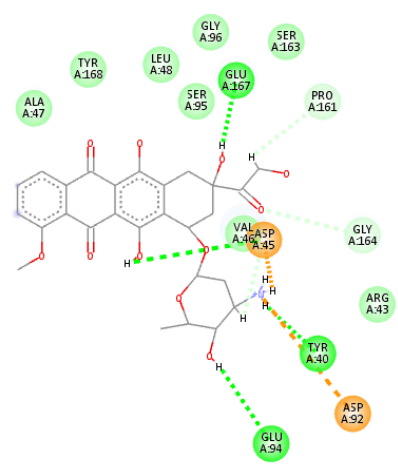

**Interactions**

|                   |                            |
|-------------------|----------------------------|
| van der Waals     | Conventional Hydrogen Bond |
| Salt Bridge       | Carbon Hydrogen Bond       |
| Attractive Charge |                            |

(4) Complex 3



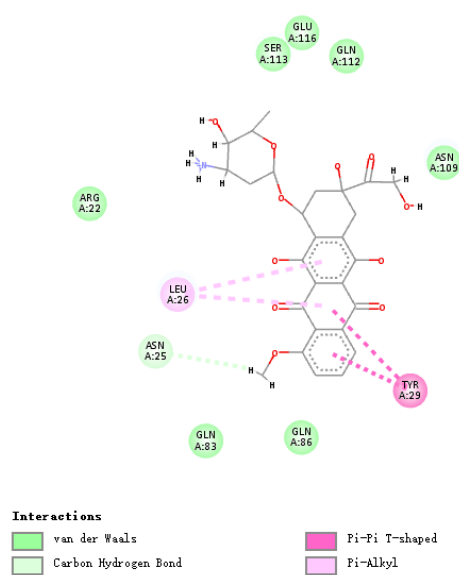

(5) Complex 2

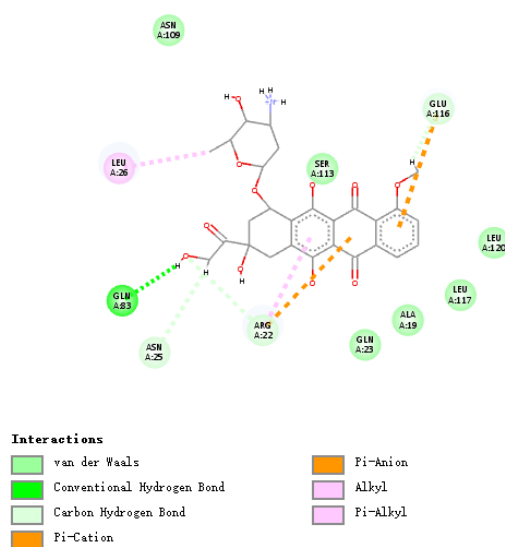

(6) Complex 6

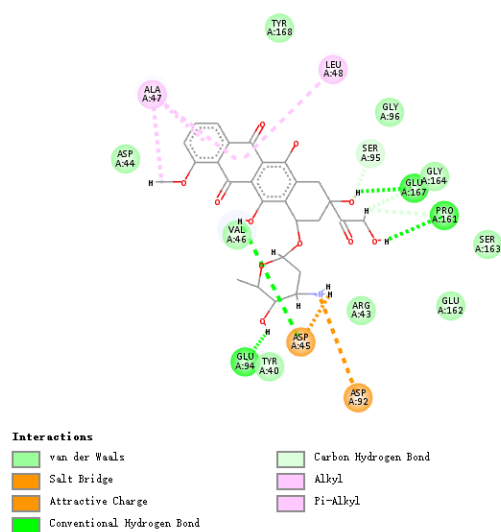

(7) Complex 7

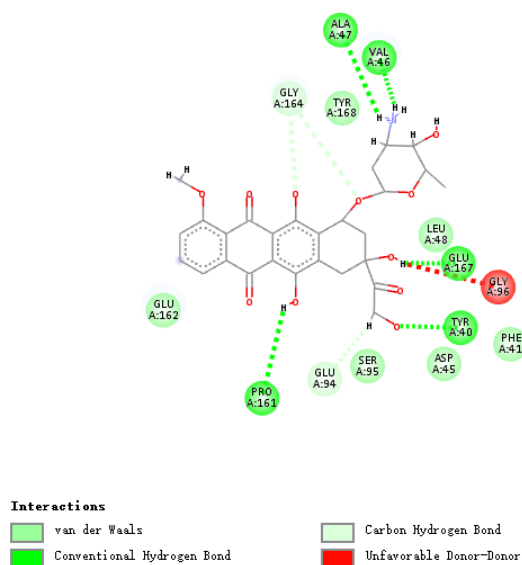

(8) Complex 8

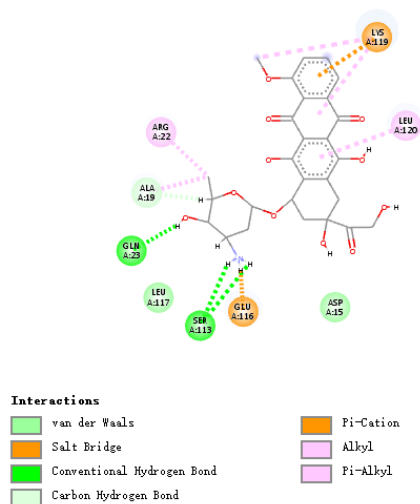

(9) Complex 9

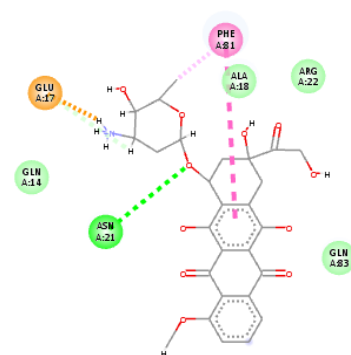

| Interactions                                                                                                                |                            |                                                                                                                             |                      |
|-----------------------------------------------------------------------------------------------------------------------------|----------------------------|-----------------------------------------------------------------------------------------------------------------------------|----------------------|
| <span style="background-color: #d9ead3; border: 1px solid black; display: inline-block; width: 15px; height: 10px;"></span> | van der Waals              | <span style="background-color: #d9ead3; border: 1px solid black; display: inline-block; width: 15px; height: 10px;"></span> | Carbon Hydrogen Bond |
| <span style="background-color: #f4cccc; border: 1px solid black; display: inline-block; width: 15px; height: 10px;"></span> | Salt Bridge                | <span style="background-color: #fce4d6; border: 1px solid black; display: inline-block; width: 15px; height: 10px;"></span> | Pi-Pi Stacked        |
| <span style="background-color: #cfe2f3; border: 1px solid black; display: inline-block; width: 15px; height: 10px;"></span> | Conventional Hydrogen Bond | <span style="background-color: #fce4d6; border: 1px solid black; display: inline-block; width: 15px; height: 10px;"></span> | Pi-Alkyl             |

**Figure S4.** Hydrogen bond, salt bridge and Pi effect interactions between HFn subunit and DOX in Complex 1-9 after 10 ns MD simulation.
